1 **Estimating individual level plant traits at scale**

2 Sergio Marconi<sup>1\*</sup>, Sarah J. Graves<sup>2,3</sup>, Ben. G. Weinstein<sup>4</sup>, Stephanie Bohlman<sup>2</sup>, Ethan P. White<sup>4</sup>

3

4 <sup>1</sup>School of Natural Resources and Environment, University of Florida, Gainesville, FL, 32611

5 USA

6 <sup>2</sup>School of Forest Resources and Conservation, University of Florida, Gainesville, FL 32603, USA

7 <sup>3</sup>University of Wisconsin-Madison, Nelson Institute for Environmental Studies, Madison, WI, United

8 States, 53706

9 <sup>4</sup>Department of Wildlife Ecology and Conservation, University of Florida, Gainesville, FL 32603, USA

10

11

12 Corresponding author: Sergio Marconi, [sergio.marconi@weecology.org](mailto:sergio.marconi@weecology.org)

13

14

## 15 **Abstract**

16 Functional ecology has increasingly focused on describing ecological communities based on  
17 their traits (measurable features affecting individuals fitness and performance). Analyzing trait  
18 distributions within and among forests could significantly improve understanding of community  
19 composition and ecosystem function. Historically, data on trait distributions are generated by (1)  
20 collecting a small number of leaves from a small number of trees, which suffers from limited  
21 sampling but produces information at the fundamental ecological unit (the individual); or (2)  
22 using remote sensing images to infer traits, producing information continuously across large  
23 regions, but as plots (containing multiple trees of different species) or pixels, not individuals.  
24 Remote sensing methods that identify individual trees and estimate their traits would provide the  
25 benefits of both approaches, producing continuous large-scale data linked to biological  
26 individuals. We used data from the National Ecological Observatory Network (NEON) to  
27 develop a method to scale up functional traits from 160 trees to the millions of trees within the  
28 spatial extent of two NEON sites. The pipeline consists of three stages: 1) image segmentation,  
29 to identify individual trees and estimate structural traits; 2) ensemble of models to infer leaf mass  
30 area (LMA), nitrogen, carbon, and phosphorus content using hyperspectral signatures, and DBH  
31 from allometry; and 3) predictions for segmented crowns for the full remote sensing footprint at  
32 the NEON sites.

33 The  $R^2$  values on held out test data ranged from 0.41 to 0.75 on held out test data. The ensemble  
34 approach performed better than single partial least squares models. Carbon performed poorly  
35 compared to other traits ( $R^2$  of 0.41). The crown segmentation step contributed the most  
36 uncertainty in the pipeline, due to over-segmentation. The pipeline produced good estimates of  
37 DBH ( $R^2$  of 0.62 on held out data). Trait predictions for crowns performed significantly better

38 than comparable predictions on pixels, resulting in improvement of  $R^2$  on test data of between  
39 0.07 to 0.26. We used the pipeline to produce individual level trait data for ~5 million individual  
40 crowns, covering a total extent of ~360 km<sup>2</sup>. This large dataset allows testing ecological  
41 questions on landscape scales, revealing that foliar traits are correlated with structural traits and  
42 environmental conditions.

43

44 Keywords: Plant traits, Foliar, Structural, NEON, Hyperspectral, LiDAR, Individual Tree Crown

45

## 46 1. Introduction

47 Functional traits are biochemical, physiological and structural characters that influence organism  
48 performance or fitness (Nock et al., 2016). They are central to how organisms perform under  
49 different environmental conditions, interact with other species, and influence the ecosystems to  
50 which they belong (McGill 2006, Dwyer et al., 2017, Collalti et al., 2019). For individual  
51 organisms, traits influence core demographic parameters including survival and reproduction. At  
52 the species level, traits influence species distributions and how species respond to changes in  
53 land use and climate (Pollock et al., 2012). At the ecosystem level, organismal traits influence  
54 biogeochemical cycles and habitat availability for other species (e.g., Fisichelli et al., 2015).  
55 Given their central importance across multiple levels of organization, understanding how traits  
56 vary within and among species, across environmental gradients, and through time is essential to  
57 understanding many areas of ecology and predicting how ecological systems will change in the  
58 future (McGill 2006, Lawler et al. 2010, Valladares et al., 2014, Diaz et al., 2016).

59 In trees, two commonly studied groups of traits are specific to (1) properties of leaves (e.g. , leaf  
60 mass per area, nitrogen and phosphorus concentration) and (2) the size structure of the full tree  
61 (e.g. height, dbh, canopy size). These characters hold different information about tree properties  
62 and how they link to forest functions. Nitrogen and phosphorus, for example, are fundamental  
63 proxies of leaf productivity because of their fundamental role in photosynthesis (Tang et al.,  
64 2018); LMA is a widely used indicator of different leaf anatomy and foliar structure strategies  
65 (Poorter et al., 2008); and tree height and dbh are indicators of tree structure and growth. Having  
66 access to measures of both leaf and structural (or physiognomic) traits for individual trees across  
67 the landscape potentially unlocks the ability to explore different dimensions of biodiversity  
68 together, investigate how these properties influence each other and affect competition among  
69 neighboring trees, and link to tree functions like growth and carbon exchange. However,  
70 exploring the links between leaf and structural traits across landscape is challenging, in part  
71 because of the differences in the design of their sampling approach.

72 Historically, structural traits are collected for thousands of trees in targeted areas via programs  
73 such as the US Forest Inventory and Analysis, whereas studies of leaf chemical traits have relied  
74 on collecting samples of a few leaves from a small number of individuals. These values are used  
75 to estimate the average trait values for each species and to explore how ecosystem level leaf  
76 traits vary biogeographically or through time by assuming that all individuals of a species in a  
77 region share the same trait value (Swenson et al., 2010, Clark et al., 2016). This approach is  
78 necessary because it is expensive and time consuming to collect individual level leaf trait data,  
79 but it fails to describe trait variation within species driven by evolution and plastic responses to  
80 the conditions an individual or population experiences (Messier et al., 2017, Niinemets et al,  
81 2017, Muller et al. 2010, Nicotra et al. 2010, Albert et al. 2010, Callaway et al. 2003). Moreover,

82 since the number of leaf trait records is often orders of magnitude smaller than tree structural  
83 trait records, discrepancy in their sample size may affect the generality of relationships observed  
84 between leaf and structural traits at landscape scales. This limitation is magnified when studying  
85 changing environments (across space or time) because of bias in where the data for each species  
86 is collected. Data are typically collected in small subsets of the full range of conditions that  
87 species experience and are often selected in a biased manner that fits the purpose of the original  
88 studies (e.g., selecting individuals of a particular health status, size or species). Measuring traits  
89 systematically across geographic gradients would address this limitation, but is not feasible with  
90 traditional field methods (Anderson-Teixeira 2015).

91 An alternative approach that allows continuous estimation of traits across the landscape is to use  
92 remote sensing data (Kerr & Ostrovsky, 2003, Homolova et al. 2013, Houborg et al., 2015). For  
93 example, (a) hyperspectral remote sensing imagery is used to estimate the chemical composition  
94 of sunlit leaves by measuring light absorption and reflectance in the visible and near-infrared  
95 spectrum (Asner et al., 2017), and (b) light detection and ranging (LiDAR) is used to measure  
96 vertical and horizontal vegetation structure (Andersen et al., 2005). Leveraging remote sensing  
97 approaches allows for measuring trait information continuously at landscape scales. Together,  
98 LiDAR and hyperspectral data can be used to estimate many of the standard leaf and structural  
99 tree traits for trees (Serbin et al., 2014, Singh et al., 2015, Asner et al., 2017, Barbosa et al.,  
100 2017).

101 Traditionally, remote sensing applications use either the pixel (the smallest resolution component  
102 of the image, Audebert et al., 2019) or the plot (a region of space typically containing multiple  
103 individuals, Singh et al., 2015, ) as the fundamental unit. This is a natural result of the structure  
104 of the remote sensing data combined with the difficulty of linking individual crowns in remote

105 sensing images to field data, especially for small crowns harder to detect with airborne  
106 technology (Jakubowski et al., 2013). However, pixel or plot-based output results in a  
107 disconnect between the remote sensing analysis and one of the fundamental biological units: the  
108 individual (Liu et al., 2016, De Angelis, 2018, Marconi et al. 2019). Individual plants reproduce,  
109 interact with their neighbors, and exhibit plastic responses to environmental conditions at the  
110 individual scale. Populations of individuals evolve in response to natural selection. As a result,  
111 our understanding of many biological processes is grounded in the individual and many field-  
112 based survey methods focus on collecting data with individual trees as the primary unit of  
113 measurement. While forest inventories hold information of the individual trees in each plot  
114 (Newnham et al., 2015), plot level estimates from remote sensing typically do not include  
115 information about the relative distribution of individuals and their traits within the plot, thus  
116 reducing the amount of information about community structure. To fully understand how traits  
117 vary across space and time, and are determined by biological processes, it is important to  
118 develop approaches linking these fundamental characteristics to individual trees in ways that can  
119 be applied at scales of hundreds of km<sup>2</sup>.

120 Despite its importance for biological research, few studies have attempted to model both leaf and  
121 structural traits using remote sensing at the individual level over landscape scales (but see  
122 Chadwick & Asner 2016, Martin et al., 2018). Even when crown level models are developed, the  
123 resulting leaf trait predictions are made for pixels, not crowns, due to the challenges in crown  
124 segmentation, poor spatial resolution of hyperspectral data, or misalignment between LiDAR and  
125 hyperspectral data (Blaschke, 2010). Similarly, there are few studies estimating structural traits  
126 (like crown height and area) at crown level, with traditional methods predicting tree height and  
127 cover at the plot level (Kaartinen et al., 2012). Perhaps as a result of these differences, structural

128 and chemical leaf traits are not currently predicted together at large scales. Consequently,  
129 ecology lacks the large scale individual level trait estimates that are necessary to fully understand  
130 tradeoffs between leaf and tree structural traits, and to explore how trait variability relates to  
131 species and the environment. Data from NEON Airborne Observatory Platform NEON (AOP)  
132 provide co-registered, georeferenced, and atmospherically corrected high resolution  
133 hyperspectral data and LiDAR, whose integration represents a great opportunity to circumvent  
134 these challenges.

135 To address this gap, we developed a pipeline for making crown level trait predictions at scales of  
136  $\sim 400 \text{ km}^2$  with associated uncertainties on both crown segmentation and trait estimation.  
137 Building on Chadwick & Asner (2016) and Martin et al. (2018), we: (1) identify individual  
138 crowns in remote sensing imagery that are associated with field-based trait measurements; (2)  
139 build models relating the remote sensing data to the field-based trait measurements; and (3)  
140 apply those models to estimate trait values and examine patterns of tree structural and chemical  
141 traits from individual to landscape scales. We advance the state of the art (Chadwick & Asner  
142 2016, Martin et al. 2018) in this pipeline by using crown-level models and comparing them to  
143 pixel- and crown average-level models, directly estimating uncertainty in trait predictions using  
144 likelihoods, and predicting traits at the crown-level. Finally, derived data products on the  
145 location, size, shape, and leaf traits of millions of individual trees distributed over tens of  
146 thousands of hectares.

## 147 2. Methods

148 In our pipeline for predicting crown level leaf and structural traits from remote sensing we used:  
149 1) field measurements of traits for building and evaluating models; 2) data on the shape and

150 location of individual tree crowns (ITCs) for building accurate models and assessing uncertainty  
151 in crown segmentation algorithms; and 3) high resolution remote sensing LiDAR (for crown  
152 segmentation and estimation of structural traits) and hyperspectral data (for estimation of leaf  
153 chemical traits). To obtain these components, we combined National Ecological Observatory  
154 Network's (NEON) airborne observatory data with field data we collected at NEON sites on leaf  
155 traits as well the location and shape of individual tree crowns.

## 156 2.1. Site descriptions

157 The study was conducted at two core terrestrial NEON sites; Ordway Swisher Biological Station  
158 in Florida (OSBS, NEON Domain 03) and the Oakmulgee Management District of Talladega  
159 National Forest in Alabama (TALL, NEON Doman 08). The two sites (Appendix S1: Figure S.1)  
160 have a mix of deciduous, evergreen, and mixed forest types (Homer et al., 2012). Upland areas at  
161 both sites are dominated by fire-tolerant oaks and pine species, primarily longleaf pine (*Pinus*  
162 *palustris*). The longleaf pine at OSBS forms open stands whereas the longleaf pine canopy at  
163 TALL is more closed. Lowland areas near lakes or wetlands (OSBS), and riparian areas (TALL)  
164 are dominated by closed canopy hardwood forests ([Beckett and Golden 1982](#), [Cox and Hart](#)  
165 [2015](#)).

## 166 2.2. Remote sensing data

167 All aerial remote sensing data products were provided by the NEON Airborne Observation  
168 Platform (NEON-AOP, Table 1). We used data from the May 2014 flight for OSBS, and the  
169 June 2015 flight for TALL. We used the raw L1 data products: (1) "classified LiDAR point  
170 cloud", and (2) "hyperspectral surface reflectance" data, orthorectified and atmospherically



171 corrected (details in [data.neonscience.org/api/v0/documents/NEON.DOC.001288vA](https://data.neonscience.org/api/v0/documents/NEON.DOC.001288vA)). To  
172 reduce the effects of non-lambertian diffuse scattering, we applied the topographic and  
173 bidirectional reflectance distribution function (BRDF) corrections by adapting scripts from the  
174 HyTools repository (<https://github.com/EnSpec/HyTools-sandbox>) to our dataset. The LiDAR  
175 data consist of 3D spatial point coordinates (4-6 points/m<sup>2</sup>) which provides high resolution  
176 information about crown shape and height. These data are released in 1 km x 1 km tiles.  
177 Hyperspectral reflectance data consist of 1m<sup>2</sup> spatial resolution images with 426 channels (or  
178 bands), each one collecting the magnitude of reflectance in 5 nm wide interval of wavelengths,  
179 ranging from visible to near infrared light (from 350 to 2500 nm). These images were provided  
180 as multiple ~15 km x 0.8 km flight lines with a total area of ~215 km<sup>2</sup> in OSBS, and ~145 km<sup>2</sup> in  
181 TALL. The hyperspectral images were provided as “prototype” data, pre-processed differently  
182 than post 2017 data, and delivered on hard drives. Prototype airborne data showed misalignments  
183 between LiDAR and hyperspectral products, (as well as across hyperspectral flightpaths), on the  
184 scale of 1-2 meters (Marconi et al. 2019, Appendix S1: Figure S.6), primarily affecting pixels at  
185 crown borders. Despite the prototype data being potentially of lower quality than the newer  
186 NEON AOP data, we used it to match the collection dates of the field data. The only difference  
187 with current L1 and L3 data is in the nomenclature of the .h5 data structure, making the methods  
188 presented here suitable with more recent NEON data.

189

### 190 2.3. Field Data

191 During this project, leaf trait data collected by the NEON Terrestrial Observation System (TOS)  
192 were not available. Instead, we used a dataset of leaf samples collected for 157 trees, many of

193 which were near NEON inventory plots that are randomly located across the study site and  
194 stratified by land cover type. The sampled trees were located away from major roads, had crowns  
195 visible from airborne aircraft and identifiable in the image, and had sunlit branches that were  
196 accessible for leaf collection. Trees were not sampled within NEON plots to avoid disturbing  
197 NEON's long-term monitoring efforts. As wide a range of species as possible were collected,  
198 including some rarer species that occurred far from NEON plots (Appendix S1: Figure S.2).

199 Trait data were collected in the early part of the peak growing season in 2015. Specifically, 81  
200 individual trees (of 17 species) were sampled from OSBS in May-June 2015, and 78 individuals  
201 (26 species) in July 2015 from TALL. Leaves were sampled from the sunlit portion of the  
202 canopy with a shotgun. Immediately after collection, the leaves were placed in a labeled plastic  
203 bag and stored in a cooler until they could be processed in the field lab within 2-4 hours of  
204 collection. The collected leaves were randomly sampled for further processing in two ways.  
205 First, a sample of leaves (at least 20 grams of fresh leaves) was analyzed for nitrogen (%N),  
206 carbon (%C), phosphorus (%P) by weight, according to standard protocols, with the exception  
207 that petioles were removed (Murphy and Riley 1962; Cornelissen et al. 2003). Second, a sample  
208 was processed for LMA using the Carnegie Institute for Science spectrometrics protocol  
209 (<https://gao.asu.edu/spectranomics>, Asner et al., 2011). Whole leaves were weighed then  
210 scanned on a flatbed scanner to determine leaf area. The leaves were then dried at 60 C for at  
211 least 72 hours and reweighed to get the dry leaf mass. For needle-leaf species, a sample of  
212 individual needles (at least 3 fascicles per sample) was scanned and weighed. The needled  
213 dimensions of a subset of the samples were also measured with calipers to calculate total surface  
214 area. These measurements showed good agreement with the projected surface area from the

215 scans ( $R^2 > 0.75$ ). This data and complete metadata will be added to TRY database v.6 (Kattge et  
216 al., 2020).

217 Individual trees were mapped in the remote sensing images using a field tablet and GIS software.  
218 Mapping was done on 2014 imagery for OSBS, and on 2015 imagery for TALL. This process  
219 involved mapping individual tree crowns on the hyperspectral image in the field to ensure the  
220 sampled trees matched directly with image pixels (Graves et al., 2018). This individual tree  
221 crown (ITC) data provides the most accurate link of field measurements with pixels from remote  
222 sensing spectral data and was used to quantify uncertainty in crown segmentation algorithms.

#### 223 2.4. The algorithm pipeline

224 We developed a modular pipeline based on three steps: (1) build and evaluate crown  
225 segmentations from LiDAR data (section 2.6); (2) develop an ensemble of statistical models to  
226 infer leaf mass per area (LMA,  $\text{g m}^{-2}$ ), nitrogen (%N), phosphorus (%P), and carbon (%C) per  
227 tree from hyperspectral data (section 2.5), and models to estimate structural traits [diameter at  
228 breast height, DBH (cm), crown area, CA ( $\text{m}^2$ ) and stem height, H (m)] from LiDAR data; (3)  
229 make predictions for every individual tree crown in both NEON sites. For each crown, we also  
230 extracted values of elevation, slope and aspect provided as NEON AOP data products (Table 1),  
231 aiming to build a comprehensive dataset including topographic, leaf chemical and tree structural  
232 traits for any tree detected within the AOP footprint. We limited our analysis to individual tree  
233 crowns taller than 2 meters and wider than  $1\text{m}^2$ . Since the field traits dataset was for sunlit  
234 foliage, we predicted traits only from the upper portion of the canopy. The structure of the  
235 pipeline presented in this paper is summarized in Figure 1.

## 236 2.5. Leaf chemistry model

237 After correcting the hyperspectral data with the bidirectional reflectance distribution function  
238 and topographic correction, we extracted all pixels within the boundaries of the field-delineated  
239 ITCs. Shadowed or low vegetation pixels within the ITCs were removed using thresholds for  
240 both a near infrared band (reflectance in 860 nm < 0.3) and the Normalized Difference  
241 Vegetation Index (NDVI < 0.7) (Appendix S1: Figure S.3) Colgan et al., 2012, Graves et al.,  
242 2016). We normalized the spectral values for each pixel by dividing each spectral vector by its  
243 root sum of squares. We used this method to further reduce the effect of peripheral light and  
244 shadows within each crown (Singh et al., 2015, Feilhauer et al., 2010).

245 Field data were split at the tree level, and stratified by species, into training (n = 115), validation  
246 (n = 18), and test sets (n = 24). Since the two sites have similar species composition, we  
247 aggregated the two datasets to build a joint model. As is common for trait studies, our field data  
248 on foliar traits was averaged to a single value for each individual tree. Most algorithms require  
249 associating a single vector of predictor variables (i.e. the spectra) to a single response value (e.g.  
250 tree crown or plot). However, individual crowns contain multiple pixels, and crowns vary in the  
251 number and quality of these pixels. In each crown, some pixels will be better for linking traits to  
252 hyperspectral signatures because they reflect light primarily from leaves, whereas other pixels  
253 include reflectance from branches, understory, or ground. To address this, we used a bagging  
254 approach (Song et al., 2013) that takes advantage of different pixel characteristics by training,  
255 weighting, and ensembling models fit to different subsets of pixels. This approach weights the  
256 predictions from models fit to different pixels to produce a more generalizable and accurate  
257 representation of the relationship between foliar traits and their spectral signatures. To capture  
258 the range of possible models from different subsets of pixels in each crown, we randomly

259 sampled one pixel from each training crown 1000 times, and used the resulting 1000 vectors of  
260 pixels (one pixel for each crown in the dataset) to build 1000 independent partial least squares  
261 generalized linear regression (PLS-GLR) models (Bastien et al., 2005, Bertrand et al, 2014).  
262 Instead of the regular PLS regressions used in most trait modeling (e.g., Singh et al., 2015, Wang  
263 et al., 2020, Chadwick et al., 2018) we used PLS-GLR because it uses maximum likelihood  
264 estimation to calculate the regression parameters. This is an improvement over current  
265 approaches because it: (1) allows the calculation of AIC for model averaging (Burnham &  
266 Anderson 2002); (2) provides a robust measure of uncertainty in the form of a prediction interval  
267 (Christoffersen, 1998), which allows estimating the range of out of sample predictions rather  
268 than the range of mean response; and (3) does not require bootstrapping, making the method  
269 more scalable. We used a log-normal link function for all models to reflect the fact that all traits  
270 are positive numbers. We treated site (OSBS versus TALL) as a one hot encoder fixed effect  
271 (Harris & Harris, 2010) to account for site specific ancillary conditions. The number of  
272 components included in each model were determined using 5-fold cross-validation (CV) using  
273 the PRESS statistic (Tapley, 2000) on the training set. Models for each leaf trait were trained  
274 independently.

275 We compared four modeling strategies that varied in how the models were developed and how  
276 the models were applied for testing (Appendix S1: Table S.1). The models are labelled based on  
277 how the model was applied as “pixel based” (applied to individual pixels) or “crown based”  
278 (applied to segmented crowns). The models were built as follows: 1) a pixel-based approach  
279 with the spectra of a single pixel randomly extracted from each crown (SPM). This approach  
280 represents the case in which only the coordinates of the leaf sample are available, and spectral  
281 information can be extracted by sampling from a pixel corresponding to the stem or leaf location;

282 2) A pixel based approach (hereafter referred as the “ensemble pixel based model” (or EPBM)  
283 that included information on crown identity by labelling each pixel with an individual crown  
284 identifier and using it to ensemble a selection of 100 SPM models using multi-model averaging  
285 based on delta AIC (Burnham & Anderson 2002). In this step, we selected the 100 models for  
286 each trait that best performed on the independent validation dataset (n =15). This step was  
287 fundamental to: (a) drop models that performed worse than chance ( $R^2 < 0$ ) and therefore held  
288 not meaningful relationships; (b) massively reduce the computational resources required to scale  
289 predictions to hundreds of km<sup>2</sup>. This approach requires crown boundaries information for training  
290 but not for application, since it applies to individual pixels; 3) a simple crown average approach,  
291 hereafter “Crown Average Spectra” (CAS), where each individual tree was represented by the  
292 average of the spectra across all green pixels (i.e. pixels with NDVI >0.7 and NIR > 0.3) within  
293 the crown polygon; 4) A crown average approach, that we refer to as the “Crown Ensemble  
294 Aggregation Model” (CEAM), consisting on averaging predictions from the EPBM for all sunlit  
295 pixels belonging to individual tree crown polygons. We tested the performance of each approach  
296 in two ways, on pixels extracted from (1) ground delineated crowns (Graves et al., 2018), and (2)  
297 algorithmically delineated crowns (Silva et al., 2016). This step was fundamental to quantify the  
298 effect of uncertainty in crown detection and segmentation on predicting leaf traits at crown level  
299 across the landscape where no field delineated crowns are available.

300 All models were tested on the 24 crowns withheld in the test dataset. The test data were not used  
301 at any phase of the fitting or the ensemble process. Accuracy was evaluated using the predictive  
302 coefficient of determination ( $R^2$ ) and the root-mean-square error (RMSE). The coefficient of  
303 determination produces values between 1 and negative infinity, where negative values indicate  
304 that the model predictability is lower than the sample average. As such, negative  $R^2$  values

305 indicate that the statistical model did not learn any meaningful information from the data. A  
306 value of 1 indicates that predicted values perfectly match observations. We evaluated the  
307 uncertainty of predictions for each model using the coverage of the 95% prediction interval  
308 (95PI). The prediction interval is the range of values that is expected to contain 95% of the  
309 observed data points, and therefore a model with good estimates of uncertainty should have  
310 approximately 95% of the test data falling within this range. Since the CEAM was generated by  
311 the ensemble of the 100 best SPMs, we estimated the 95PI for CEAM predictions by averaging  
312 the error functions for the same 100 SPMs. We used the same data split, data transformation and  
313 PLS-GLR parameterization for all models. For pixel-based estimations (SPM and EPBM), we  
314 compared ground measures of LMA, N, C, and P with predictions from each pixel in the test  
315 dataset. For crown-based estimations (CAS and CEAM), we averaged pixel-based predictions  
316 belonging to all of the pixels in the crown. The same rationale was used for comparing pixel and  
317 crown-based uncertainty.

## 318 2.6. Tree structural traits and crown segmentation

319 We used the lidR R package (Roussel & Auty, 2017) to process point cloud LiDAR data to  
320 create a 0.5 m<sup>2</sup> resolution canopy height model (CHM) and produce algorithmically delineated  
321 crowns. Despite there was little difference to the 1m<sup>2</sup> resolution of NEON CHM, we chose an  
322 higher resolution CHM to produce smoother polygons and leverage the information in regions  
323 where the point cloud was more dense. We used the CHM to determine the number of trees in  
324 the scene (i.e. tree detection) using local maxima filtering (Popesco et al., 2004). We tested three  
325 alternative methods for crown segmentation (Dalponte & Coomes 2016, Silva et al., 2016, and a  
326 watershed algorithm as in Barnes et al., 2014) and chose the best performing one to generate

327 crown boundaries (Appendix S1: Table S.2, Appendix S1: Section 1). To evaluate accuracy of  
328 crown detection and segmentation on the targeted landscapes, we calculated: (1) an estimate of  
329 precision from all predicted crowns whose boundaries overlapped with the field ITCs; (2)  
330 pairwise Jaccard index coefficient (Real & Vargas, 1996), which represents the intersection over  
331 union between the areas of two polygons, and is the standard benchmarking metric for image  
332 analysis (Rezatofighi et al., The Jaccard index was calculated by comparing ITCs collected in  
333 the field with the single most overlapping predicted crown (Marconi et al., Field delineated  
334 crowns that do not overlap with any crown segmented by the algorithm were labelled as  
335 undetected. 2019). We estimated tree structural traits from the derived polygons and the CHM.  
336 Crown area (CA) was calculated from the polygon geometry using the geoPandas python  
337 package (<https://geopandas.readthedocs.io/>). Tree height (H) was extracted from the CHM as the  
338 maximum height within each ITC. Diameter at breast height (DBH) was calculated using an  
339 allometric regression model relating the log-transformed DBH taken from the NEON woody  
340 plant vegetation structure data to the log-transformed height and canopy area of the matching  
341 algorithmically delineated crowns for 566 individual stems. Delineated crowns were matched to  
342 field-mapped stems in the NEON dataset visually (Appendix S1: Table S.3).

## 343 2.7. Building individual-level derived data for full flight paths

344 Each remote sensing image was split into 1 km<sup>2</sup> tiles to optimize computational resources and  
345 allow parallelization on hundreds of cores. We pre-processed each tile using the same filters used  
346 for developing the models. To make predictions we used the EPBMs ensemble models to  
347 produce rasters of LMA, %C, %P and %N predictions and the 95PI for each suitable pixel and  
348 averaged them to crown level by using algorithmically delineated crowns. Crown-based  
349 predictions were achieved by averaging the values of all suitable pixels within the corresponding



350 predicted ITC boundaries. For those areas where the ITC overlapped with more than one flight  
351 path (flight paths overlap by ~30%), we averaged the crown-based predictions from both flight  
352 paths.

353 We stored flight-paths level maps of traits into raster data-products. The crown level dataset was  
354 then compiled as a comma delimited file containing all the geometry information to rebuild  
355 polygon shapes and locations. The data is distributed in a Zenodo archive  
356 (<http://doi.org/10.5281/zenodo.3232978>).

357

### 358 3. Results

359 We chose the crown segmentation algorithm described in Silva et al. (2016) (Appendix S1:  
360 Table S.2) to produce algorithmically delineated crowns. The approach detected ~88% of the  
361 field crowns (Appendix S1: Table S.5), but showed lower accuracy in estimating the shape and  
362 size of the canopies for individual trees, with Jaccard Index ranging between 0 (for undetected  
363 trees) and 0.81, with an average of 0.35. Crowns identified by the algorithm were generally  
364 larger than those delineated in the field, resulting in overestimated crown areas (especially for  
365 smaller trees) and weak correlations between field data and algorithmic crown areas (Figure 2).  
366 Low goodness of fit in predicting Crown Area (CA) was exacerbated by uncertainty in alignment  
367 with field and remote sensing data. For example, field crowns were delineated on the  
368 hyperspectral images to incorporate only the pure pixels of the crown (Graves et al., 2018,  
369 Appendix S1: Figure S.4, Appendix S1: Figure S.5) leading to potentially underestimating the  
370 full extent of tree crown size. Moreover, visual assessment of paired field and algorithmically  
371 delineated crowns shows shifts by 1-2 meters that likely result from imperfect alignment  
372 between LiDAR and hyperspectral data (Appendix S1: Figure S.6; Marconi et al. 2019), further

373 affecting uncertainty in field to algorithmically estimated crowns. Estimates of other structural  
374 traits from the algorithmic tree crowns were better than crown area estimates. Height showed the  
375 highest correspondence between field and remotely sensed measures ( $R^2 = 0.90$  for trees higher  
376 than 3m). Despite low accuracy in its predictions, CA showed a significant effect in estimating  
377 DBH from LiDAR (Appendix S1: Table S.3). However, tree height was the most important  
378 variable in predicting DBH, which therefore resulted in good estimates for both sites ( $0.62 R^2$ ),  
379 in the range of other recent applications (0.59 in Dalla Corte et al., 2020, 0.62 to 0.83 from Yao  
380 et al., 2012).

381 We compared the four methods - two applied to pixels (the single pixel methods, SPM, and  
382 ensemble pixel methods, EPBM) and two applied to crowns (the crown average, CAS and the  
383 crown based ensemble methods, CEAM) - using RMSE. When tested on pixels extracted from  
384 field delineated crowns, CEAM performed the best for %N and %P (RMSE of 0.20 and 0.026),  
385 and CEAM and EPBM performed equivalently for LMA (RMSE of 40.3 and 40.8 respectively)  
386 (Figure 3A, Appendix S1: Figure S.7). CEAM explained 75% of the variance in LMA, 66% of  
387 the variance in %N, 46% of the variance in %P, and 41% of the variance in %C (Appendix S1:  
388 Table S.4, Appendix S1: Figure S.8). These results were comparable to those obtained by Martin  
389 et al. (2018) for trees in Borneo (71%, 46%, 44%, 48% respectively for LMA, %N, %P, %C).  
390 Despite “site” ancillary information was an important feature for all models, its influence on  
391 traits predictions was always relatively low compared to reflectance (as shown by the models’  
392 parameters, Appendix S1: Figure S.9). The root mean squared error (normalized by traits  
393 observations range, NRMSE) was always between 8 and 16% of the range of the field  
394 observations, meeting the quality threshold recommended by Singh et al. (2015).

395 The ensemble approaches (CEAM and EPBM) performed better than methods based on pixels as  
396 the fundamental unit (SPM) or simple averaging of all green pixels in a crown (CAS) when the  
397 assessment was on field delineated crowns (Appendix S1: Table S.4; Figure 3A). Few individual  
398 SPMs performed better than the EPBM ensembles (Appendix S1: Figure S.10) and when  
399 individual pixel models did outperform the ensemble, they usually were not among the best SPM  
400 models (i.e., the models with the lowest delta AIC in the validation). This suggests that EPBM  
401 provides the best method for making out-of-sample predictions at the pixel level. CEAM  
402 generally produced the best estimates of uncertainty. CEAM 95PI showed an average coverage  
403 of 95% of held out observations, CAS 94%, EPSM 91%, Plot and SBM 90%, with the ideal  
404 value being 95% (Figure 3D).

405 The CEAM approach performed best when making predictions using pixels extracted from  
406 algorithmically delineated crowns (Figure 3). Compared to when crown boundaries are collected  
407 from the field, the accuracy of predictions using algorithmically delineated crowns was reduced  
408 due to the uncertainty associated with crown segmentation. However, CEAM showed the lowest  
409 reduction in accuracy compared to the other approaches ( $\Delta$ NRMSE  $\sim$  2%, Figure 3C), resulting  
410 in the lowest NRMSE for all traits (Figure 3B).

411 Scaling algorithmic crown segmentation and trait estimation to the full extent of the NEON  
412 remote sensing data yielded trait predictions for approximately 5 million canopy trees for the two  
413 sites combined (Figure 4, Appendix S1: Figure S.11, S.12, S.13). Landscape patterns in traits are  
414 evident, including east-west gradients in LMA, %N, and %P at OSBS (Figure 4). At TALL,  
415 lower LMA and higher %N and %P are found in a dendritic pattern associated with the stream  
416 network (Appendix S1: Figure S.12). Some traits show a bimodal distribution at each site, which  
417 is probably related to differences in needleleaf versus broadleaf species but would need to be

418 further tested with trait estimation coupled with species predictions. On average, OSBS showed  
419 higher %N and %P compared to TALL (Figure 5). Distributions of LMA, %N, and %P in OSBS  
420 shifted to higher values than TALL, following patterns observed from the field data (Figure 5,  
421 Appendix S1: Figure S.15). Assessing correlations between estimated structural traits, leaf traits,  
422 and abiotic environmental conditions showed strong correlations between LMA, %N, and %P,  
423 consistent with the leaf economic spectrum (Wright et al., 2004) (Appendix S1: Figure S.14). Of  
424 the environmental variables, elevation had the strongest relationship with leaf traits with leaf N  
425 and P decreasing and LMA increasing with elevation (Figures S.15, S.16). Leaf traits and tree  
426 structure were correlated at OSBS (e.g. LMA with tree H, figure 5B) but not TALL.

## 427 4. Discussion

428 The individual organism is one of the fundamental units of biology. As a result, studying the  
429 distribution of individuals and their traits across space and through time is central to many  
430 aspects of ecology. However, collecting individual level data at the large scales required for  
431 many ecological questions is challenging. To address this limitation we develop a fully  
432 automated modular pipeline to link remote sensing products from the National Ecological  
433 Observatory Network (NEON) to data collected in the field, convert the remote sensing data into  
434 estimates of the leaf and structural traits for all canopy trees detected at landscape scales, and  
435 estimate the traits for millions of individual trees in an open and accessible format (Cassey et al.,  
436 2006, Hampton et al., 2016) for use by the broader scientific community.

437 We found that modeling and predicting leaf traits at the individual crown level resulted in  
438 improved accuracy and uncertainty in the predictions compared to pixel based approaches  
439 (Figure 3). Linking pixels to crowns allows the ensembling of models built from the different

440 pixels making up the crowns. Different pixels contain different combinations of leaves, branches,  
441 understory and ground, which affects the underlying chemometric relationship between foliar  
442 traits and their spectral signature. Weighted ensembling provides one way to address this, by  
443 allowing the models to identify the best combinations of pixels for relating traits and  
444 hyperspectral signatures. Aggregating pixel predictions to the crown level may also reduce the  
445 influence of outlier pixels. Our method produced models with predictive power comparable to  
446 two other crown-based estimation methods (Barbosa and Asner, 2017; Martin et al., 2018),  
447 suggesting that the performance of these approaches may generalize beyond the current study. In  
448 addition to providing robust leaf trait estimates, crown level methods allow the simultaneous  
449 estimation of structural traits, allowing these two sets of traits to be analyzed together at large  
450 scales.

451 2019). This is likely because height is directly measured by LIDAR and height was the most  
452 important factor in the allometric models used to predict DBH. 2018, Jucker et al. 2016). While  
453 our crown-based methods were effective for estimating a number of leaf and structural traits,  
454 there is substantial uncertainty even for the best performing traits. Quantifying this uncertainty  
455 provides information on the range of likely trait values for each individual and allows this  
456 uncertainty to be propagated when using these derived data values to test scientific hypotheses  
457 (Miller-Gulland and Shea, 2017). We used methods for leaf trait estimation that allowed us to  
458 estimate uncertainty (pls-GLR) and the crown-based method (CEAM) provided the best  
459 uncertainty estimates (Figure 3, Appendix S1: Table S.4). Current methods for delineating  
460 crowns do not include explicit measures of uncertainty (Dalponte & Coomes 2016, Silva et al.,  
461 2016). It is important for future methods to address this limitation because comparisons to field  
462 data suggested high uncertainty in segmentation.

463 One of the challenges for crown level approaches is that they rely on crown segmentation  
464 algorithms to identify the location and size of individual trees. While we used the best  
465 performing crown segmentation the algorithm from a recent methods competition (Marconi et al.  
466 2019) and had reasonable correspondence between the presence of an algorithmic crown and  
467 each field crown, the algorithmic crowns averaged only 35% overlap in area with the most  
468 similar field delineated crown. Heterogeneity in point cloud density and misalignment between  
469 lidar and hyperspectral sensors could contribute to misalignment between field and  
470 algorithmically delineated crowns (Marconi et al, 2019, Kamoske et al., 2019, Appendix S1:  
471 Section 1). Despite this uncertainty, estimates of DBH and height were well correlated with field  
472 values. Therefore data derived from our pipeline should be useful for assessing estimates of  
473 individual tree biomass by applying allometric functions linking biomass to DBH and height  
474 (Graves et al. Crown area was more susceptible to the segmentation uncertainty, but is also more  
475 sensitive to small errors in segmentation and CHM resolution (Appendix S1: Section 1).

476 Uncertainty in crown segmentation can also have cascading impacts on the estimation of leaf  
477 traits, which was tested by comparing results from field versus algorithmically delineated tree  
478 crowns. Prediction accuracy is generally lower when using algorithmically delineated crowns  
479 because the pixels used for making predictions both include pixels that are not in the true crown  
480 and exclude pixels that are in the true crown. However, these decreases in accuracy were  
481 generally quite small, with decreases in NRMSE of  $<0.05$  across all methods. The crown-based  
482 ensemble method (CEAM) was particularly robust to this uncertainty, with the smallest increases  
483 in NRMSE and all traits maintaining NRMSE below Singh et al. (2015)'s threshold (Figure 3C,  
484 Appendix S1: Table S.4). This robustness may result because the weighted ensembles in CEAM

485 provide the ability to weight pixels algorithmically, allowing it to ignore pixels from outside of  
486 the true crown.

487 Generating derived individual level data on leaf and structural traits at the landscape scale allows  
488 trait patterns at these scales to be effectively assessed. While a complete analysis of the spatial  
489 distribution of tree traits is beyond the scope of this paper, our results showed some general  
490 patterns worth future investigations. LMA, %N, and %C showed bimodal distributions at both  
491 sites (with %N peaks particularly close in OSBS), likely because pines and oaks, the most  
492 common needleleaf and broadleaf genera respectively at these two sites, occupy distinct regions of  
493 the worldwide Leaf Economic Spectrum (LES)(Wright et al., 2004). Correlation patterns  
494 between LMA and %N, %N and %P, and LMA and %P match the global scale patterns observed  
495 globally in the LES. Despite the limited number of species and geographical extent, both sites  
496 showed rangeand spread of LMA, %N and %P overlapping with most of the global range of the  
497 worldwide LES tradeoffs (Appendix S1: Figure S.14). This suggests that variation in the local  
498 environment could be driving large intra-species variability of leaf traits, while conserving the  
499 general trade-offs observed across species (Asner et al., 2016). Among the environmental  
500 variables we tested, elevation showed the strongest correlation with leaf traits (Appendix S1:  
501 Figure S.16, Appendix S1: Figure S. 17), possibly because elevation represents a proxy of  
502 different soil conditions in these sites, which can affect both species distributions and leaf traits  
503 (Walter & Gerlach, 2013). For example, small differences in elevation at OSBS often means  
504 transitioning from drained sandhill (that favor pines) to marshy and richer soils that favor the  
505 establishment of large-crowned broadleaf species, rich in foliar %N and %P (Bodker et al.,  
506 2015).

507 Producing derived data at the individual level also facilitates landscape scale assessments of  
508 relationships between leaf and structural traits at the level of individual organisms. For example,  
509 although the two sites have similar species composition, our results showed different  
510 correlational patterns between structural (height and DBH) and chemical traits (LMA, %N, %P,  
511 %C) (Figure 5, Appendix S1: Figure S.17), especially the relationship between height and LMA  
512 ( $r = 0.24$  in OSBS,  $r = -0.08$  in TALL). Possible explanations for these relationships may be  
513 related to differences in management histories across patches of the landscape that can influence  
514 species assembly, successional stages, which are important determinants of tree size and leaf  
515 traits (Sameulson and Stokes 2012; Ishida et al. 2005). Our pipeline, integrated with further  
516 remote sensing derived information (e.g. species identities) and local history (e.g. management  
517 and fire history) could be used to address how these drivers affect local distribution of plant  
518 traits, their trade-offs, and their effects on the ecosystems across a multitude of landscapes.

519 Our crown-based approach to modeling and predicting tree traits produces individual data similar  
520 to that collected in the field. This approach has a number of benefits. First, it will make data  
521 integration with field-based forest and trait surveys easier because both derived remote sensing  
522 data and field surveys will be composed of the same fundamental unit (individual trees). Second,  
523 crown-based approaches are likely better for aligning trait data across years. The same pixel in  
524 two consecutive years could vary significantly in a trait because of small errors in spatial  
525 alignment of pixels through time, whereas large crown-level regions will be more robust to small  
526 errors at the edges of the crown. Moreover, multi-temporal and multi-sensor images can be  
527 potentially leveraged to align and improve segmentation for crown objects captured in the same  
528 scene (Bovolo & Buzzzone, 2017, Sumbul et al., 2020). Finally, this approach allows a more  
529 compact representation of derived trait data in tabular forms spatial polygons instead of rasters.



530 While this will not be the best representation for all analyses, for individual level analyses it  
531 results in vastly reduced storage computational requirements compared to raster data.

532 Thanks to the modular nature of our approach, crown segmentation can easily be substituted with  
533 methods based on RGB (Weinstein et al., 2020) or hyperspectral imaging (Dalponte et al., 2016)  
534 when LiDAR data is poor or not available. Yet, individual level approaches are limited by data  
535 availability and are not suitable for addressing ecological questions at continental to global scale.  
536 High resolution airborne remote sensing is still limited to relatively few sites, while the  
537 resolution of AVIRIS or satellite data is more appropriate for plot level analyses (e.g., Singh et  
538 al. 2015, Martin et al. 2018, Ma et al. 2019). However, these two approaches can be potentially  
539 integrated to scale sub-pixel properties from satellite data, and merge the gap between local,  
540 regional and global scale ecological information, and better address emergent cross-scale  
541 ecological questions related to variation of leaf traits, diversity and functions (Carmona et al.,  
542 2016).

543 The data produced by our individual level pipeline could be extended by including predictions  
544 for species identity, other leaf and structural traits, environmental variables, management, or  
545 disturbance. Moreover, our pipeline can potentially be used to extract ecological information for  
546 every tree that can be detected across all NEON AOP sites for the full life of the observatory.  
547 This will produce a publicly available, spatially explicit database of detailed ecological  
548 information for hundreds of millions of trees across the US that could be fused with other  
549 continental data (e.g. Forest Inventory and Analysis) and integrated to area based analyses from  
550 satellite data, to address cross scale functional ecological questions  
551 (<http://doi.org/10.5281/zenodo.3232978>). Such data could be used to further understand the

552 biology behind trait tradeoffs and investigate cross scale ecological processes and patterns from  
553 individual to landscape to continental scale.

## 554 *5. Acknowledgments*

555 This work was supported by the Gordon and Betty Moore Foundation's Data-Driven Discovery  
556 Initiative through grant GBMF4563 to E.P. White and by the National Science Foundation  
557 through grant 1926542 to E.P. White, S.A. Bohlman, A. Zare, D.Z. Wang, and A. Singh; by the  
558 NSF Dimension of Biodiversity program grant (DEB-1442280) and USDA/NIFA McIntire-  
559 Stennis program (FLA-FOR-005470) to S. A. Bohlman; by the University of Florida  
560 Biodiversity Institute (UFBI) and Informatics Institute (UFII) Graduate Fellowship to Sergio  
561 Marconi. There was no additional external funding received for this study.

562

## 563 *6. Description of author's responsibilities*

564

565 Sergio Marconi and Sarah Graves designed the experiment, Sarah Graves carried out field work,  
566 Sergio Marcon, Sarah Graves and Ethan White developed the methods, Sergio Marconi  
567 performed the analysis, Ethan White and Stephanie Bohlman supervised the work as lab leaders,  
568 helped with experimental design and advice on data analysis. Ben Weinstein helped with  
569 technical aspects and manuscript editing. All authors contributed to editing the manuscript. We  
570 acknowledge Dr. Adytia Singh for his suggestions in the initial phase of the project, and the  
571 reviewers that contributed to significantly improve this manuscript.

572

## 573 References

- 574 1. Albert, C.H., Thuiller, W., Yoccoz, N.G., Soudant, A., Boucher, F., Saccone, P. and  
575 Lavorel, S., 2010. Intraspecific functional variability: extent, structure and sources of  
576 variation. *Journal of Ecology*, 98(3), pp.604-613.
- 577 2. Andersen, H.E., McGaughey, R.J. and Reutebuch, S.E., 2005. Estimating forest canopy  
578 fuel parameters using LIDAR data. *Remote sensing of Environment*, 94(4), pp.441-449.
- 579 3. Anderson □ Teixeira, K.J., Davies, S.J., Bennett, A.C., Gonzalez □ Akre, E.B.,  
580 Muller □ Landau, H.C., Joseph Wright, S., Abu Salim, K., Almeyda Zambrano, A.M.,  
581 Alonso, A., Baltzer, J.L. and Basset, Y., 2015. CTFS □ ForestGEO: a worldwide network  
582 monitoring forests in an era of global change. *Global change biology*, 21(2), pp.528-549.
- 583 1. Asner, G.P., Martin, R.E., Knapp, D.E., Tupayachi, R., Anderson, C.B., Sinca, F.,  
584 Vaughn, N.R. and Llactayo, W., 2017. Airborne laser-guided imaging spectroscopy to  
585 map forest trait diversity and guide conservation. *Science*, 355(6323), pp.385-389.
- 586 4. Asner, G.P., Knapp, D.E., Anderson, C.B., Martin, R.E. and Vaughn, N., 2016. Large-  
587 scale climatic and geophysical controls on the leaf economics spectrum. *Proceedings of*  
588 *the National Academy of Sciences*, 113(28), pp.E4043-E4051.
- 589 5. Asner, G. P., Martin, R. E., Tupayachi, R., Emerson, R., Martinez, P., Sinca, F., ... &  
590 Lugo, A. E. (2011). Taxonomy and remote sensing of leaf mass per area (LMA) in humid  
591 tropical forests. *Ecological Applications*, 21(1), 85-98.

- 592 6. Audebert, B. Le Saux and S. Lefevre, "Deep Learning for Classification of Hyperspectral  
593 Data: A Comparative Review," in IEEE Geoscience and Remote Sensing Magazine, vol.  
594 7, no. 2, pp. 159-173, June 2019, doi: 10.1109/MGRS.2019.2912563.
- 595 7. Bannister, J.M., Herbert, E.R. and Craft, C.B., 2015. Spatial variability in sedimentation,  
596 carbon sequestration, and nutrient accumulation in an alluvial floodplain forest. In *The*  
597 *Role of Natural and Constructed Wetlands in Nutrient Cycling and Retention on the*  
598 *Landscape* (pp. 41-55). Springer, Cham.
- 599 8. Barbosa, J.M. and Asner, G.P., 2017. Prioritizing landscapes for restoration based on  
600 spatial patterns of ecosystem controls and plant–plant interactions. *Journal of Applied*  
601 *Ecology*, 54(5), pp.1459-1468.
- 602 9. Barnes, R., Lehman, C., Mulla, D., 2014. Priority-flood: An optimal depression-filling  
603 and watershed-labeling algorithm for digital elevation models. *Computers & Geosciences*  
604 62, 117–127. doi:10.1016/j.cageo.2013.04.024
- 605 10. Bastien, P., Vinzi, V.E. and Tenenhaus, M., 2005. PLS generalised linear regression.  
606 *Computational Statistics & data analysis*, 48(1), pp.17-46.
- 607 11. Blaschke, T., 2010. Object based image analysis for remote sensing. *ISPRS journal of*  
608 *photogrammetry and remote sensing*, 65(1), pp.2-16.
- 609 2. Bodker, J.E., Turner, R.E., Tweel, A., Schulz, C. and Swarzenski, C., 2015. Nutrient-  
610 enhanced decomposition of plant biomass in a freshwater wetland. *Aquatic Botany*, 127,  
611 pp.44-52.

- 612 12. M. Han, Y., Bovolo, F. and Bruzzone, L., 2017. Segmentation-based fine registration of  
613 very high resolution multitemporal images. *IEEE Transactions on Geoscience and*  
614 *Remote Sensing*, 55(5), pp.2884-2897.
- 615 13. Callaway, R.M., Pennings, S.C. and Richards, C.L., 2003. Phenotypic plasticity and  
616 interactions among plants. *Ecology*, 84(5), pp.1115-1128.
- 617 14. Carmona, C.P., De Bello, F., Mason, N.W. and Lepš, J., 2016. Traits without borders:  
618 integrating functional diversity across scales. *Trends in ecology & evolution*, 31(5),  
619 pp.382-394.
- 620 15. Cassey, P. and Blackburn, T.M., 2006. Reproducibility and repeatability in ecology.  
621 *BioScience*, 56(12), pp.958-959.
- 622 16. Chadwick, K.D. and Asner, G.P., 2016. Organismic-scale remote sensing of canopy  
623 foliar traits in lowland tropical forests. *Remote Sensing*, 8(2), p.87.
- 624 17. Christoffersen, P.F., 1998. Evaluating interval forecasts. *International economic review*,  
625 pp.841-862.
- 626 18. Clark, J.S., Gelfand, A.E., Woodall, C.W. and Zhu, K., 2014. More than the sum of the  
627 parts: forest climate response from joint species distribution models. *Ecological*  
628 *Applications*, 24(5), pp.990-999.
- 629 19. Clark, J.S., 2016. Why species tell more about traits than traits about species: predictive  
630 analysis. *Ecology*, 97(8), pp.1979-1993.
- 631 20. Colgan, M.S., Baldeck, C.A., Féret, J.B. and Asner, G.P., 2012. Mapping savanna tree  
632 species at ecosystem scales using support vector machine classification and BRDF

- 633 correction on airborne hyperspectral and LiDAR data. *Remote Sensing*, 4(11), pp.3462-  
634 3480.
- 635 21. Collalti, A., P. E. Thornton, A. Cescatti, A. Rita, M. Borghetti, A. Nole, C. Trotta, P.  
636 Ciais, and G. Matteucci., 2019. The sensitivity of the forest carbon budget shifts across  
637 processes along with stand development and climate change. *Ecological Applications*  
638 00(0): e01837. 10.1002/eap.1837
- 639 22. Cornelissen, J. H. C., S. Lavorel, E. Garnier, S. Diaz, N. Buchmann, D. E. Gurvich, P. B.  
640 Reich, H. ter Steege, H. D. Morgan, M. G. A. van der Heijden, J. G. Pausas, and H.  
641 Poorter. 2003. A handbook of protocols for standardised and easy measurement of plant  
642 functional traits worldwide. *Australian Journal of Botany* 51:335 – 380.
- 643 23. Dalponte, M. and Coomes, D.A., 2016. Tree-centric mapping of forest carbon density  
644 from airborne laser scanning and hyperspectral data. *Methods in ecology and evolution*,  
645 7(10), pp.1236-1245.
- 646 24. De Angelis, D.L., 2018. Individual-based models and approaches in ecology:  
647 populations, communities and ecosystems. CRC Press.
- 648 25. Diaz et al, 2016, The global spectrum of plant form and function. *Nature* 529:167–171.  
649 10.1038/nature16489.
- 650 26. Dwyer, J.M. and Laughlin, D.C., 2017. Constraints on trait combinations explain climatic  
651 drivers of biodiversity: The importance of trait covariance in community assembly.  
652 *Ecology letters*, 20(7), pp.872-882.

- 653 27. Feilhauer, H., Asner, G.P. and Martin, R.E., 2015. Multi-method ensemble selection of  
654 spectral bands related to leaf biochemistry. *Remote Sensing of Environment*, 164, pp.57-  
655 65.
- 656 28. Frederic Bertrand, Nicolas Meyer and Myriam Maumy-Bertrand (2014). Partial Least  
657 Squares Regression for Generalized Linear Models, R package version 1.1.1.
- 658 29. Graves, S.J., Caughlin, T.T., Asner, G.P. and Bohlman, S.A., 2018. A tree-based  
659 approach to biomass estimation from remote sensing data in a tropical agricultural  
660 landscape. *Remote sensing of environment*, 218, pp.32-43.
- 661 30. Graves, S.J., Asner, G.P., Martin, R.E., Anderson, C.B., Colgan, M.S., Kalantari, L. and  
662 Bohlman, S.A., 2016. Tree species abundance predictions in a tropical agricultural  
663 landscape with a supervised classification model and imbalanced data. *Remote Sensing*,  
664 8(2), p.161.
- 665 31. Graves S, Gearhart J, Caughlin TT, Bohlman S. 2018. A digital mapping method for  
666 linking high-resolution remote sensing images to individual tree crowns. *PeerJ*  
667 *Preprints*6:e27182v1 <https://doi.org/10.7287/peerj.preprints.27182v1>
- 668 32. Hampton, S.E., Anderson, S.S., Bagby, S.C., Gries, C., Han, X., Hart, E.M., Jones, M.B.,  
669 Lenhardt, W.C., MacDonald, A., Michener, W.K. and Mudge, J., 2015. The Tao of open  
670 science for ecology. *Ecosphere*, 6(7), pp.1-13.
- 671 33. Harris, D. and Harris, S., 2010. *Digital design and computer architecture*. Morgan  
672 Kaufmann.

- 673 34. Houborg, R., Fisher, J.B. and Skidmore, A.K., 2015. Advances in remote sensing of  
674 vegetation function and traits.
- 675 35. Jakubowski, K., Q. Guo, and M. Kelly. 2013. Tradeoffs between lidar pulse density and  
676 forest measurement accuracy. *Remote Sensing of Environment* 130:245–253.
- 677 36. Jucker, T., Avăcărișei, D., Bărnoaiea, I., Duduman, G., Bouriaud, O. and Coomes, D.A.,  
678 2016. Climate modulates the effects of tree diversity on forest productivity. *Journal of*  
679 *Ecology*, 104(2), pp.388-398.
- 680 3. Kaartinen, H., Hyypä, J., Yu, X., Vastaranta, M., Hyypä, H., Kukko, A., Holopainen,  
681 M., Heipke, C., Hirschmugl, M., Morsdorf, F. and Næsset, E., 2012. An international  
682 comparison of individual tree detection and extraction using airborne laser  
683 scanning. *Remote Sensing*, 4(4), pp.950-974.
- 684 37. Kamoske, A.G., Dahlin, K.M., Stark, S.C. and Serbin, S.P., 2019. Leaf area density from  
685 airborne LiDAR: Comparing sensors and resolutions in a temperate broadleaf forest  
686 ecosystem. *Forest Ecology and Management*, 433, pp.364-375.
- 687 38. Kattge, J., Bönisch, G., Díaz, S., Lavorel, S., Prentice, I.C., Leadley, P., Tautenhahn, S.,  
688 Werner, G.D., Aakala, T., Abedi, M. and Acosta, A.T., 2020. TRY plant trait database–  
689 enhanced coverage and open access. *Global change biology*, 26(1), pp.119-188.
- 690 39. Lawler, J.J., Tear, T.H., Pyke, C., Shaw, M.R., Gonzalez, P., Kareiva, P., Hansen, L.,  
691 Hannah, L., Klausmeyer, K., Aldous, A. and Bienz, C., 2010. Resource management in a  
692 changing and uncertain climate. *Frontiers in Ecology and the Environment*, 8(1), pp.35-  
693 43.



- 694 40. Li, X., Messina, J.P., Moore, N.J., Fan, P. and Shortridge, A.M., 2017. MODIS land  
695 cover uncertainty in regional climate simulations. *Climate Dynamics*, 49(11-12),  
696 pp.4047-4059.
- 697 41. Liu, X., Swenson, N.G., Lin, D., Mi, X., Umaña, M.N., Schmid, B. and Ma, K., 2016.  
698 Linking individual-level functional traits to tree growth in a subtropical forest. *Ecology*,  
699 97(9), pp.2396-2405.
- 700 42. Ma, X., Mahecha, M.D., Migliavacca, M., van der Plas, F., Benavides, R., Ratcliffe, S.,  
701 Kattge, J., Richter, R., Musavi, T., Baeten, L. and Barnoaiea, I., 2019. Inferring plant  
702 functional diversity from space: the potential of Sentinel-2. *Remote Sensing of*  
703 *Environment*, 233, p.111368.
- 704 43. Marconi, S., Graves, S.J., Gong, D., Nia, M.S., Le Bras, M., Dorr, B.J., Fontana, P.,  
705 Gearhart, J., Greenberg, C., Harris, D.J. and Kumar, S.A., 2018. A data science challenge  
706 for converting airborne remote sensing data into ecological information (No. e26966v1).  
707 *PeerJ Preprints*.
- 708 44. Martin, M. E., L. C. Plourde, S. V. Ollinger, M. L. Smith, and B. E. McNeil. 2008. A  
709 generalizable method for remote sensing of canopy nitrogen across a wide range of forest  
710 ecosystems. *Remote Sensing of Environment* 112:3511–3519.
- 711 45. Martin, R.E., Chadwick, K.D., Brodrick, P.G., Carranza-Jimenez, L., Vaughn, N.R. and  
712 Asner, G.P., 2018. An approach for foliar trait retrieval from airborne imaging  
713 spectroscopy of tropical Forests. *Remote Sensing*, 10(2), p.199.

- 714 46. McGill, B.J., Enquist, B.J., Weiher, E. and Westoby, M., 2006. Rebuilding community  
715 ecology from functional traits. *Trends in ecology & evolution*, 21(4), pp.178-185.
- 716 47. Messier, J., McGill, B.J., Enquist, B.J. and Lechowicz, M.J., 2017. Trait variation and  
717 integration across scales: is the leaf economic spectrum present at local scales?.  
718 *Ecography*, 40(6), pp.685-697.
- 719 48. Milner Gulland, E.J. and Shea, K., 2017. Embracing uncertainty in applied ecology.  
720 *Journal of applied ecology*, 54(6), pp.2063-2068.
- 721 49. Müller, I., Schmid, B. and Weiner, J., 2000. The effect of nutrient availability on biomass  
722 allocation patterns in 27 species of herbaceous plants. *Perspectives in plant ecology,*  
723 *evolution and systematics*, 3(2), pp.115-127.
- 724 50. Murphy, J., and J. P. Riley. 1962. A modified single solution method for the  
725 determination of phosphate in natural waters. *Analytica Chimica Acta* 27:31 – 36.
- 726 51. National Ecological Observatory Network. 2014. Data Products NEON.DP1.10098,  
727 NEON.DP1.30010, NEON.DP3.30015, NEON.DP1.30008. Provisional data  
728 downloaded from <http://data.neonscience.org> on 26 Jan 2016. Battelle, Boulder, CO,  
729 USA
- 730 52. Newnham, G.J., Armston, J.D., Calders, K., Disney, M.I., Lovell, J.L., Schaaf, C.B.,  
731 Strahler, A.H. and Danson, F.M., 2015. Terrestrial laser scanning for plot-scale forest  
732 measurement. *Current Forestry Reports*, 1(4), pp.239-251.
- 733 53. Nicotra, A.B., Atkin, O.K., Bonser, S.P., Davidson, A.M., Finnegan, E.J., Mathesius, U.,  
734 Poot, P., Purugganan, M.D., Richards, C.L., Valladares, F. and van Kleunen, M., 2010.

- 735 Plant phenotypic plasticity in a changing climate. *Trends in plant science*, 15(12), pp.684-  
736 692.
- 737 54. Niinemets, Ü., Keenan, T.F. and Hallik, L., 2015. A worldwide analysis of  
738 within-canopy variations in leaf structural, chemical and physiological traits across plant  
739 functional types. *New Phytologist*, 205(3), pp.973-993.
- 740 55. Nock, C. A., Vogt, R. J. and Beisner, B. E. (2016). *Functional Traits*. In eLS, John Wiley  
741 & Sons, Ltd (Ed.). doi:10.1002/9780470015902.a0026282
- 742 56. Pollock, L.J., Morris, W.K. and Vesk, P.A., 2012. The role of functional traits in species  
743 distributions revealed through a hierarchical model. *Ecography*, 35(8), pp.716-725.
- 744 57. Popescu, Sorin & Wynne, Randolph. (2004). Seeing the Trees in the Forest: Using Lidar  
745 and Multispectral Data Fusion with Local Filtering and Variable Window Size for  
746 Estimating Tree Height. *Photogrammetric Engineering and Remote Sensing*. 70. 589-  
747 604. 10.14358/PERS.70.5.589.
- 748 58. Poorter, H., Niinemets, Ü., Poorter, L., Wright, I.J. and Villar, R., 2009. Causes and  
749 consequences of variation in leaf mass per area (LMA): a meta-analysis. *New*  
750 *phytologist*, 182(3), pp.565-588.
- 751 59. Prado-Junior, J.A., Schiavini, I., Vale, V.S., Raymundo, D., Lopes, S.F. and Poorter, L.,  
752 2016. Functional traits shape size-dependent growth and mortality rates of dry forest tree  
753 species. *Journal of Plant Ecology*, 10(6), pp.895-906.
- 754 60. Real, R. and Vargas, J.M., 1996. The probabilistic basis of Jaccard's index of similarity.  
755 *Systematic biology*, 45(3), pp.380-385.

- 756 61. Rezatofighi, H., Tsoi, N., Gwak, J., Sadeghian, A., Reid, I. and Savarese, S., 2019.  
757 Generalized intersection over union: A metric and a loss for bounding box regression. In  
758 Proceedings of the IEEE Conference on Computer Vision and Pattern Recognition (pp.  
759 658-666).
- 760 62. Roussel, J.R. and Auty, D., 2017. lidR: Airborne LiDAR Data Manipulation and  
761 Visualization for Forestry Applications.
- 762 63. Sarstedt, M., Hair, J.F., Ringle, C.M., Thiele, K.O. and Gudergan, S.P., 2016. Estimation  
763 issues with PLS and CBSEM: Where the bias lies!. *Journal of Business Research*, 69(10),  
764 pp.3998-4010.
- 765 64. Sexton, J.O., Noojipady, P., Anand, A., Song, X.P., McMahon, S., Huang, C., Feng, M.,  
766 Channan, S. and Townshend, J.R., 2015. A model for the propagation of uncertainty from  
767 continuous estimates of tree cover to categorical forest cover and change. *Remote  
768 Sensing of Environment*, 156, pp.418-425.
- 769 65. Silva, C.A., Hudak, A.T., Vierling, L.A., Loudermilk, E.L., O'Brien, J.J., Hiers, J.K.,  
770 Jack, S.B., Gonzalez-Benecke, C., Lee, H., Falkowski, M.J. and Khosravipour, A., 2016.  
771 Imputation of individual Longleaf Pine (*Pinus palustris* Mill.) Tree attributes from field  
772 and LiDAR data. *Canadian journal of remote sensing*, 42(5), pp.554-573.
- 773 66. Singh, A., Serbin, S.P., McNeil, B.E., Kingdon, C.C. and Townsend, P.A., 2015. Imaging  
774 spectroscopy algorithms for mapping canopy foliar chemical and morphological traits  
775 and their uncertainties. *Ecological Applications*, 25(8), pp.2180-2197.

- 776 67. Song, L., Langfelder, P. and Horvath, S., 2013. Random generalized linear model: a  
777 highly accurate and interpretable ensemble predictor. *BMC bioinformatics*, 14(1), p.5.
- 778 68. Sumbul, G., Cinbis, R.G. and Aksoy, S., 2019. Multisource region attention network for  
779 fine-grained object recognition in remote sensing imagery. *IEEE Transactions on*  
780 *Geoscience and Remote Sensing*, 57(7), pp.4929-4937.
- 781 69. Swenson, N.G. and Weiser, M.D., 2010. Plant geography upon the basis of functional  
782 traits: an example from eastern North American trees. *Ecology*, 91(8), pp.2234-2241.
- 783 70. Tarpey, T., 2000. A note on the prediction sum of squares statistic for restricted least  
784 squares. *The American Statistician*, 54(2), pp.116-118.
- 785 71. Tang, Z., Xu, W., Zhou, G., Bai, Y., Li, J., Tang, X., Chen, D., Liu, Q., Ma, W., Xiong,  
786 G. and He, H., 2018. Patterns of plant carbon, nitrogen, and phosphorus concentration in  
787 relation to productivity in China's terrestrial ecosystems. *Proceedings of the National*  
788 *Academy of Sciences*, 115(16), pp.4033-4038.
- 789 72. Valladares, F., Matesanz, S., Guilhaumon, F., Araújo, M.B., Balaguer, L.,  
790 Benito Garzón, M., Cornwell, W., Gianoli, E., Kleunen, M., Naya, D.E. and Nicotra,  
791 A.B., 2014. The effects of phenotypic plasticity and local adaptation on forecasts of  
792 species range shifts under climate change. *Ecology letters*, 17(11), pp.1351-1364.
- 793 73. Varner, J. Morgan, et al. "Post-fire tree stress and growth following smoldering duff  
794 fires." *Forest Ecology and Management* 258.11 (2009): 2467-2474.

- 795 74. Walters, Michael B., and John P. Gerlach. "Intraspecific growth and functional leaf trait  
796 responses to natural soil resource gradients for conifer species with contrasting leaf  
797 habit." *Tree physiology* 33.3 (2013): 297-310.
- 798 75. Weinstein, B., Marconi, S., Bohlman, S., Zare, A. and White, E., 2019. Individual tree-  
799 crown detection in RGB imagery using self-supervised deep learning neural networks.  
800 *bioRxiv*, p.532952.
- 801 76. Wright, I.J., Reich, P.B., Westoby, M., Ackerly, D.D., Baruch, Z., Bongers, F.,  
802 Cavender-Bares, J., Chapin, T., Cornelissen, J.H., Diemer, M. and Flexas, J., 2004. The  
803 worldwide leaf economics spectrum. *Nature*, 428(6985), p.821.
- 804 77. Yang, J., Cao, M. and Swenson, N.G., 2018. Why functional traits do not predict tree  
805 demographic rates. *Trends in ecology & evolution*, 33(5), pp.326-336.
- 806 78. Yao, W., Krzystek, P. and Heurich, M., 2012. Tree species classification and estimation  
807 of stem volume and DBH based on single tree extraction by exploiting airborne full-  
808 waveform LiDAR data. *Remote Sensing of Environment*, 123, pp.368-380.
- 809 79. Zhen, Z., Quackenbush, L.J. and Zhang, L., 2016. Trends in automatic individual tree  
810 crown detection and delineation—evolution of lidar data. *Remote Sensing*, 8(4), p.333.
- 811

812 *Table 1. Data products and sources (National Ecological Observatory Network, 2016).*

813 *Information about data products can be found on the NEON data products catalogue*

814 *(<http://data.neonscience.org/data-product-catalog>).*

| Name                                                           | NEON data product ID                             | Data date     | How it was used                                                            |
|----------------------------------------------------------------|--------------------------------------------------|---------------|----------------------------------------------------------------------------|
| Spectrometer orthorectified at-sensor radiance                 | NEON.DP1.30008                                   | 2014 and 2015 | Hyperspectral images used to model foliar chemical and physical properties |
| Discrete return LiDAR point cloud                              | NEON.DP1.3003.001                                | 2014 and 2015 | Crown segmentation and calculation of tree height                          |
| AOP L2 and L3 data products (Albedo, Elevation, Slope, Aspect) | NEON.DP2.30012.001, DP3.30024.001, DP3.30025.001 | 2014 and 2015 | Link modeled tree crown properties with other NEON-AOP data products       |
| Woody plant vegetation structure                               | DP1.10098.001                                    | 2014-2018     | Build allometric relationship to infer DBH from Crown Area and Tree Height |
| Field ITC                                                      | Graves et al. 2018                               | 2017          | Validate crown segmentation, define tree objects.                          |

815

## 816 Figures captions

817 **Figure 1.** Workflow of the pipeline following Unified Modeling Language (UML). Left side  
818 shows the method to build and test three modeling approaches: PBM (pixel-based model), EPBS  
819 (ensemble of pixel-based models), CEAM (crown ensemble averaged model). Right side  
820 represents the part of the pipeline dealing with scaling, fusion, and public distribution of derived  
821 data. NEON L3 products fused to the derived traits data are: Aspect (DP3.30025.001), Elevation  
822 (DP3.30024.001), and Slope (DP3.30025.001).

823  
824 **Figure 2.** Comparison between observed and predicted tree structural traits for algorithmically  
825 delineated crowns corresponding to ground delineated ITCs: (A) tree crown height (m), (B) tree  
826 diameter at breast height (cm), and (C) tree crown area (m<sup>2</sup>). Yellow and blue points represent  
827 OSBS and TALL site data points respectively. Black diagonal is the 1:1 line.

828  
829 **Figure 3.** Model evaluation and comparison of pixel based (SPM, red), ensemble pixels (EPBM,  
830 grey), crown spectra average (CAS, yellow), and crown ensemble average (CEAM, blue)  
831 predictions on an independent test set of 24 observed crowns for %P, LMA, %N and %C. (A)  
832 Evaluation and comparison of RMSE from models built on pixels extracted from ground  
833 delineated crowns; (B) Evaluation and comparison of RMSE from models built on pixels  
834 extracted from algorithmically delineated crowns; (C) difference in performance (RMSE)  
835 between models tested on pixels extracted from field and algorithmically delineated crowns.  
836 Positive values mean that for that comparison model built on automatically delineated crowns  
837 performed better. (D) Coverage of the 95 predictions intervals on held out data for the four



838 *models (LMA, N, P and C). Dash-dotted line represent the ideal coverage value of 95%.*

839 **Figure 4.** *Example of predictions at the landscape scale for individual tree crowns (ITC) at*  
840 *Ordway Swisher Biological Station (OSBS). In the center, predictions of tree height for ~2.5*  
841 *million trees within NEON AOP footprint (215 km<sup>2</sup>), plotted in a quantile scale using the viridis*  
842 *color palette. Cropped images represent a ~1 km<sup>2</sup> detail of LMA, %N, %C, and %P predictions*  
843 *at scale. Expected values are presented on a quantile scale using a spectral color palette (with*  
844 *lower values in red, and higher values in blue). Range of the 95% probability intervals for the*  
845 *same area are presented on the intensity scale of blues (with lower values in white, and higher*  
846 *values in deep blue).*

847  
848 **Figure 5.** *Leaf chemical distributions and relationship with tree height on a random sample of*  
849 *100,000 derived individual tree crowns (ITCs). On the top row, comparison between*  
850 *distributions of C, LMA, %P, and %N for the two sites, OSBS (blue), and TALL (yellow).*  
851 *Vertical dotted lines represent the average for the site. Rug plots on the x-axis represent the*  
852 *marginal distribution of OSBS and TALL data between the minimum and maximum range of*  
853 *derived observations. On the lower row, example of relationship between tree height and the*  
854 *same three leaf chemical traits: from left to right, LMA, %N, %P. Linear trends and 95CI*  
855 *ellipses are represented for each relationship and site, following the same color scheme as*  
856 *above.*

857

858

859

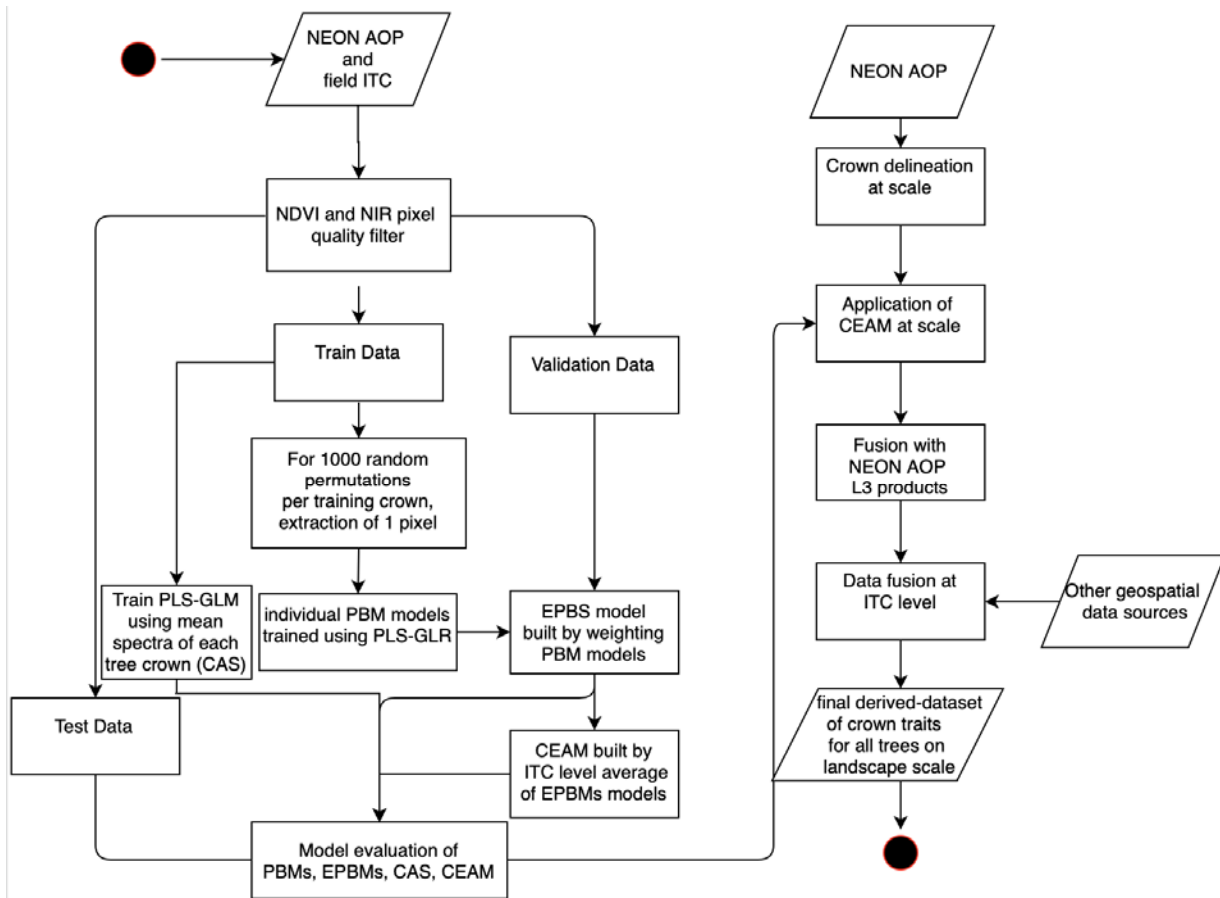

860

861 *Figure 1. Workflow of the pipeline following Unified Modeling Language (UML). Left side*

862 *shows the method to build and test three modeling approaches: PBM (pixel-based model), EPBS*

863 *(ensemble of pixel-based models), CEAM (crown ensemble averaged model). Right side*

864 *represents the part of the pipeline dealing with scaling, fusion, and public distribution of derived*

865 *data. NEON L3 products fused to the derived traits data are: Aspect (DP3.30025.001), Elevation*

866 *(DP3.30024.001), and Slope (DP3.30025.001).*

867

868

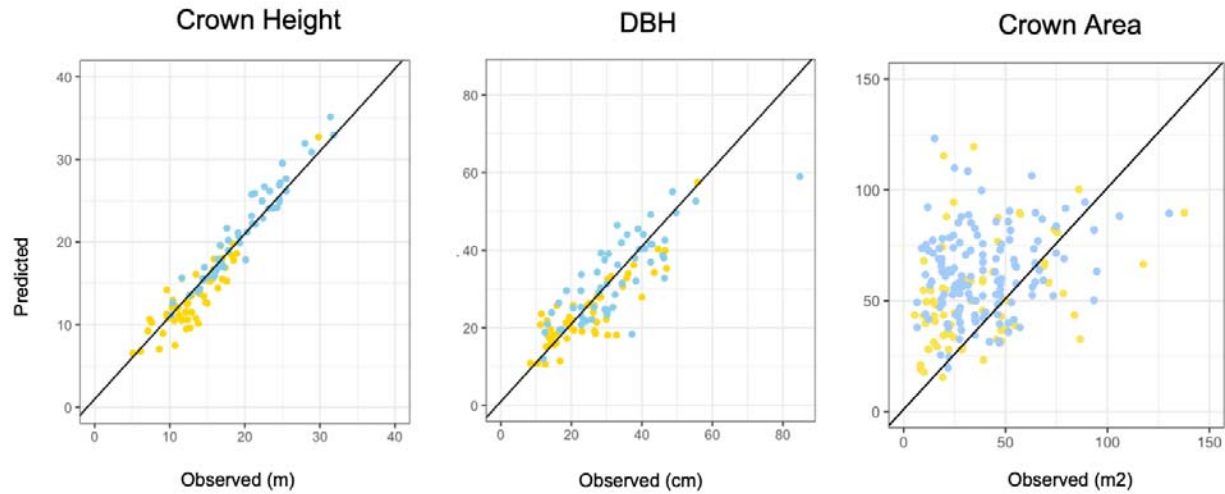

869

870 *Figure 2. Comparison between observed and predicted tree structural traits for algorithmically*  
871 *delineated crowns corresponding to ground delineated ITCs: (A) tree crown height (m), (B) tree*  
872 *diameter at breast height (cm), and (C) tree crown area (m<sup>2</sup>). Yellow and blue points represent*  
873 *OSBS and TALL site data points respectively. Black diagonal is the 1:1 line.*

874

875

876

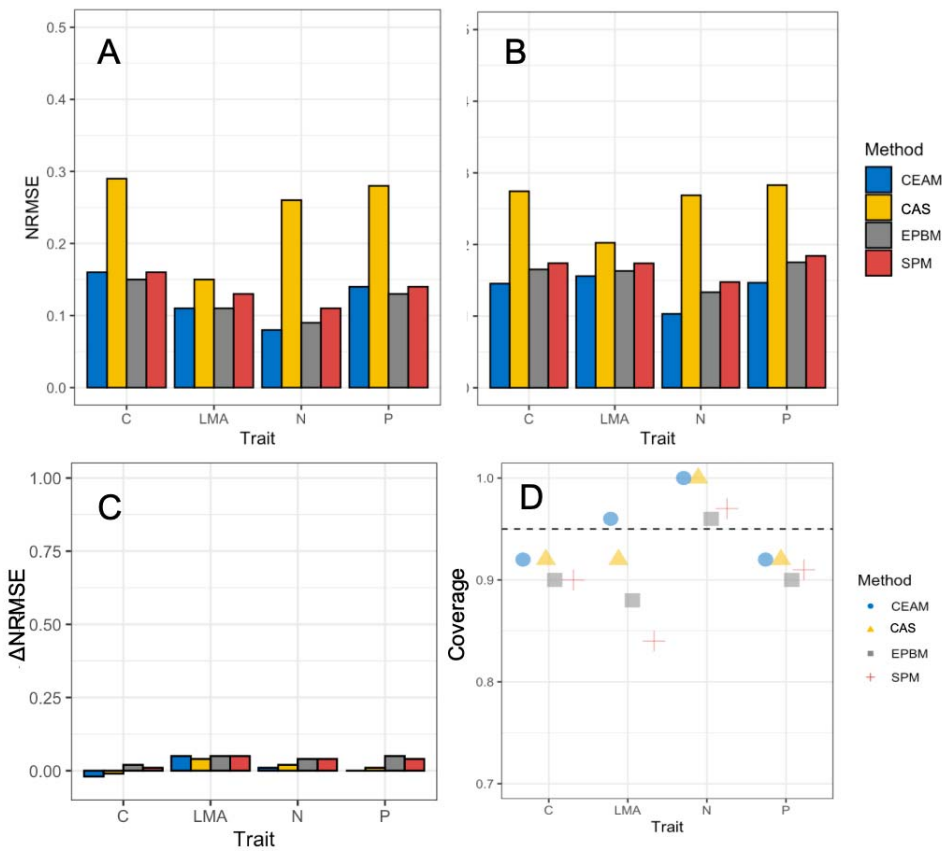

877  
 878 *Figure 3. Model evaluation and comparison of pixel based (SPM, red), ensemble pixels (EPBM,*  
 879 *grey), crown spectra average (CAS, yellow), and crown ensemble average (CEAM, blue)*  
 880 *predictions on an independent test set of 24 observed crowns for %P, LMA, %N and %C. (A)*  
 881 *Evaluation and comparison of RMSE from models built on pixels extracted from ground*  
 882 *delineated crowns; (B) Evaluation and comparison of RMSE from models built on pixels*  
 883 *extracted from algorithmically delineated crowns; (C) difference in performance (RMSE)*  
 884 *between models tested on pixels extracted from field and algorithmically delineated crowns.*  
 885 *Positive values mean that for that comparison model built on automatically delineated crowns*  
 886 *performed better. (D) Coverage of the 95 predictions intervals on held out data for the four*  
 887 *models (LMA, N, P and C). Dash-dotted line represent the ideal coverage value of 95%.*

888

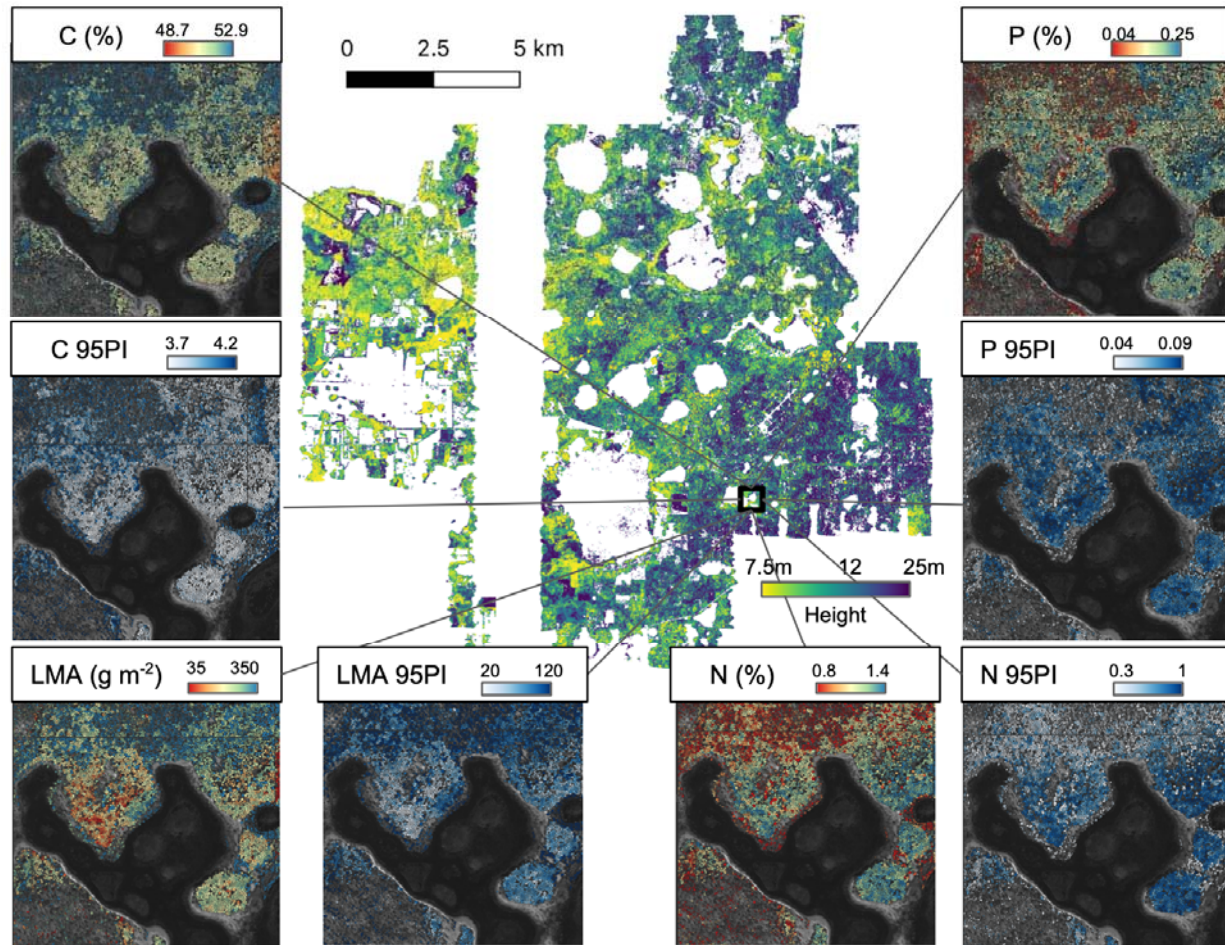

889  
890

891 *Figure 4. Example of predictions at the landscape scale for individual tree crowns (ITC) at*  
892 *Ordway Swisher Biological Station (OSBS). In the center, predictions of tree height for ~2.5*  
893 *million trees within NEON AOP footprint (215 km<sup>2</sup>), plotted in a quantile scale using the viridis*  
894 *color palette. Cropped images represent a ~1 km<sup>2</sup> detail of LMA, %N, %C, and %P predictions*  
895 *at scale. Expected values are presented on a quantile scale using a spectral color palette (with*  
896 *lower values in red, and higher values in blue). Range of the 95% probability intervals for the*  
897 *same area are presented on the intensity scale of blues (with lower values in white, and higher*  
898 *values in deep blue).*

899

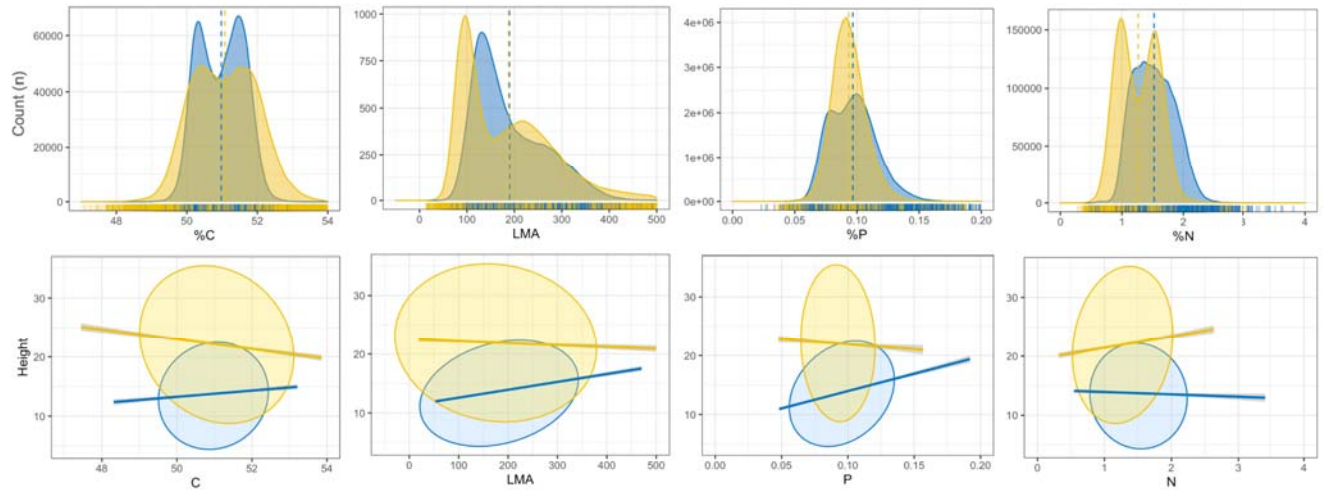

900

901 *Figure 5. Leaf chemical distributions and relationship with tree height on a random sample of*  
902 *100,000 derived individual tree crowns (ITCs). On the top row, comparison between*  
903 *distributions of C, LMA, %P, and %N for the two sites, OSBS (blue), and TALL (yellow).*  
904 *Vertical dotted lines represent the average for the site. Rug plots on the x-axis represent the*  
905 *marginal distribution of OSBS and TALL data between the minimum and maximum range of*  
906 *derived observations. On the lower row, example of relationship between tree height and the*  
907 *same three leaf chemical traits: from left to right, LMA, %N, %P. Linear trends and 95CI*  
908 *ellipses are represented for each relationship and site, following the same color scheme as*  
909 *above.*

910

911
